# Supplementary material for: Development of a tannic acid- and silicate ion-functionalized PVA–starch composite hydrogel forin situskeletal muscle repairing
Source: Royal Society of Chemistry journal article supplement (doi:10.1039/d3tb03006g), 2024-01-01
Supplement: d3tb03006g1.pdf [file d3tb03006g1.pdf]

# Supplemental Information for Correction: Development of a tannic acid and silicate ions functionalized PVA-starch composite hydrogel for in situ skeletal muscle repairing

Longkang Li,<sup>†a</sup> Huipeng Li,<sup>†b</sup> Zhentian Diao,<sup>a</sup> Huan Zhou,<sup>\*b</sup> Yanjie Bai<sup>\*bc</sup> and Lei Yang<sup>b</sup>

\* Corresponding authors

<sup>a</sup> School of Materials Science and Engineering, Hebei University of Technology, Tianjin, China

<sup>b</sup> Center for Health Science and Engineering, Hebei Key Laboratory of Biomaterials and Smart Theranostics, School of Health Sciences and Biomedical Engineering, Hebei University of Technology, Tianjin, China

E-mail: zhouhuan@hebut.edu.cn

<sup>c</sup> Department of Chemical Engineering, Hebei University of Technology, Tianjin, China

E-mail: 2021100@hebut.edu.cn

Original images For Figure 5C in manuscript.

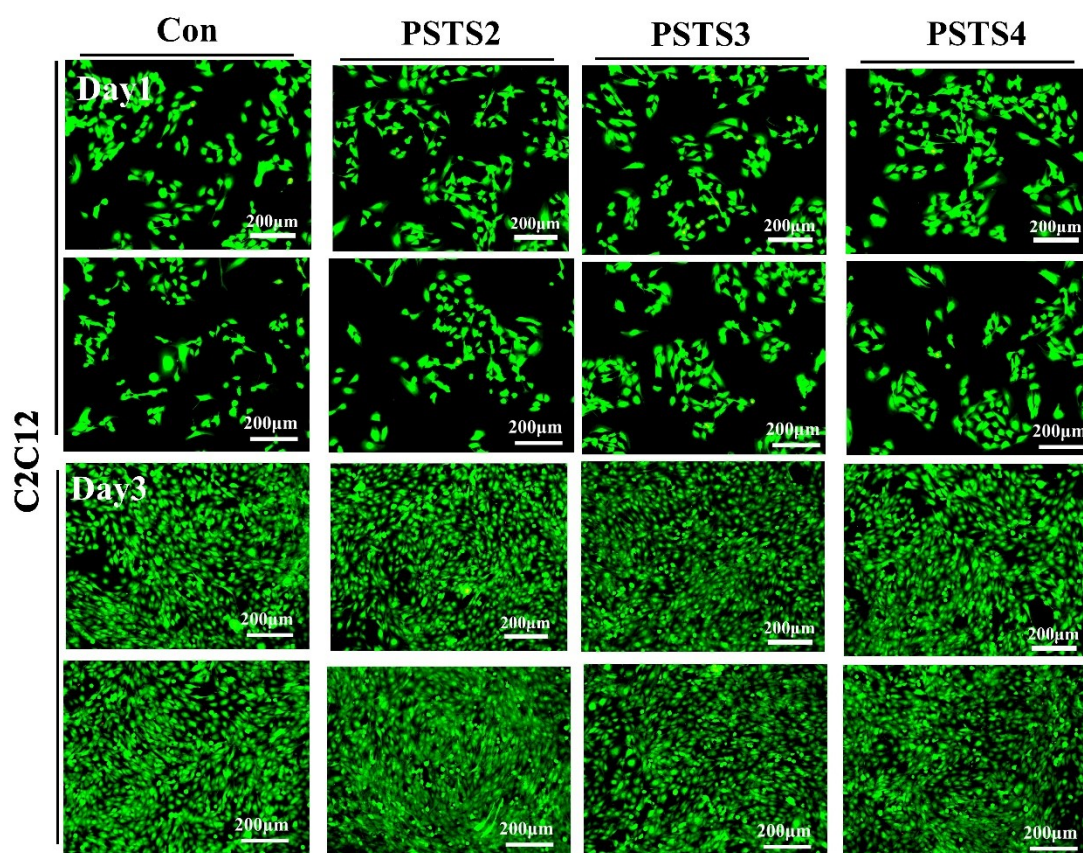

Figure 1. Cell viability/death staining of cultured C2C12 cells.

Original images For Figure 5D in manuscript.

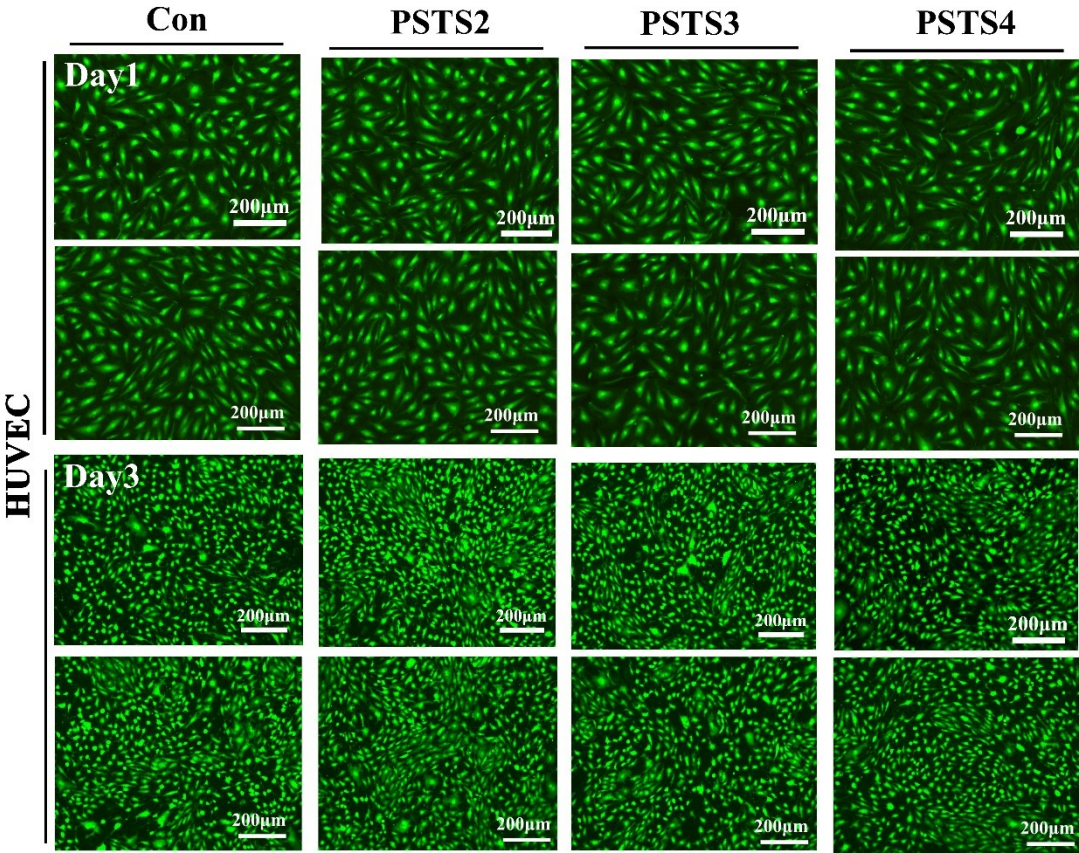

Figure 2. Cell live/dead staining of cultured HUVEC cells.



Original images For Figure7B in manuscript.

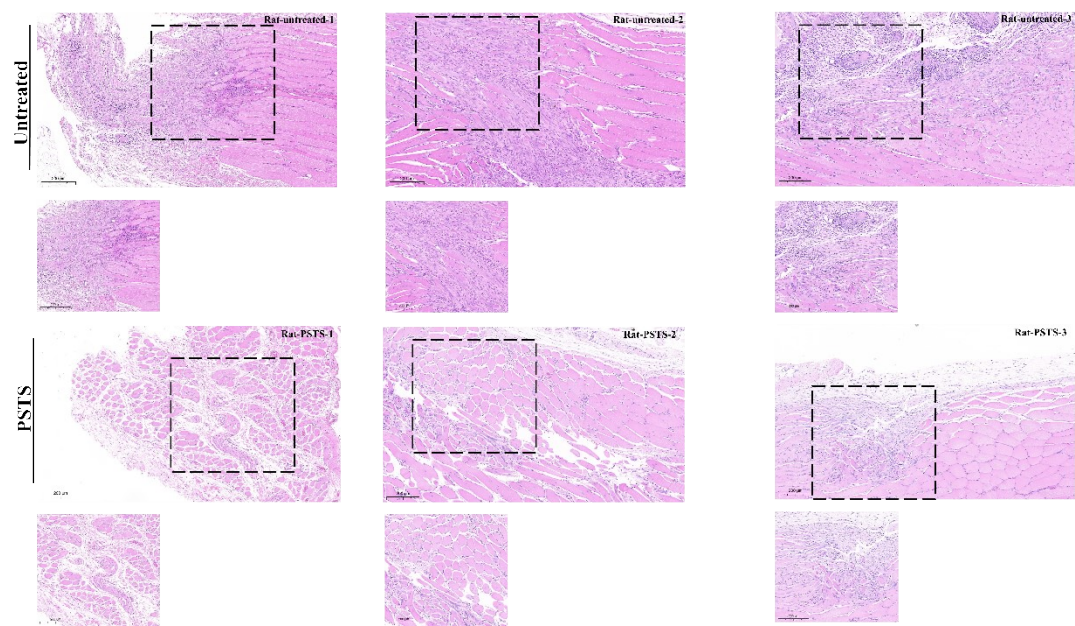

Figure 3. HE staining of rats in the Con and PSTS groups.

Original images For Figure7C in manuscript.

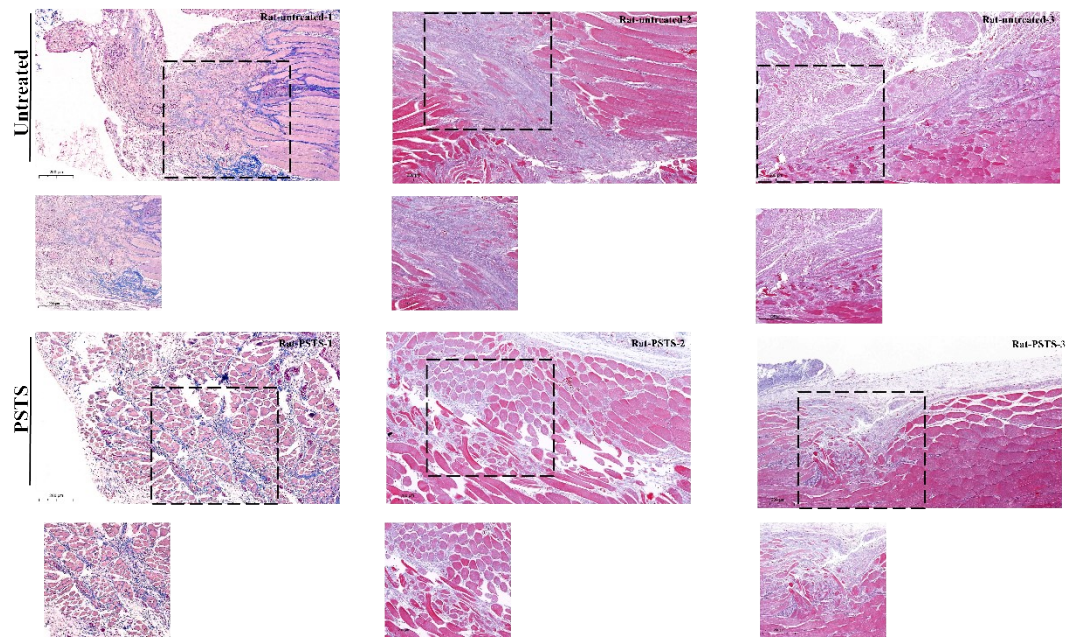

Figure 4. Masson staining of rats in the Con and PSTS groups.
